# Supplementary material for: Optical Nanoscopy of Cytokine-Induced Structural Alteration of Endoplasmic Reticulum and Golgi Apparatus in Insulin Secreting Cells
Source: Preprints.org preprint supplement (doi:10.20944/preprints202408.1000.v1), 2024-08-14
Supplement: Supplementary file 1 [file supplementary]

**Supplementary Figures**


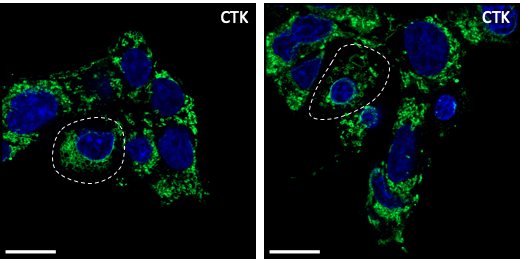


**Fig. S1 Airyscan imaging of OSER structures.** Representative images of the OSER structures of ER in INS1-E cells treated with cytokines (Il-1β and IFN-γ) for 24h. Scale bar indicates 10 µm.
